# Supplementary figures and images for: Enhanced power density in zero-vacuum-gap thermophotovoltaic devices
Source: Royal Society of Chemistry journal article supplement (doi:10.1039/d4ee04604h), 2024-12-27

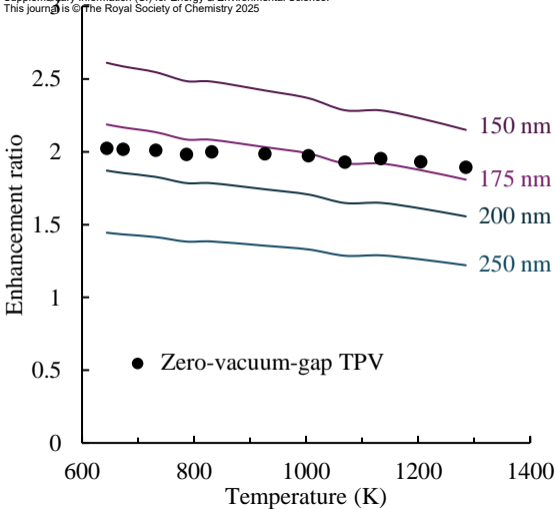

Supplement: d4ee04604h10.pdf [file d4ee04604h10.pdf]

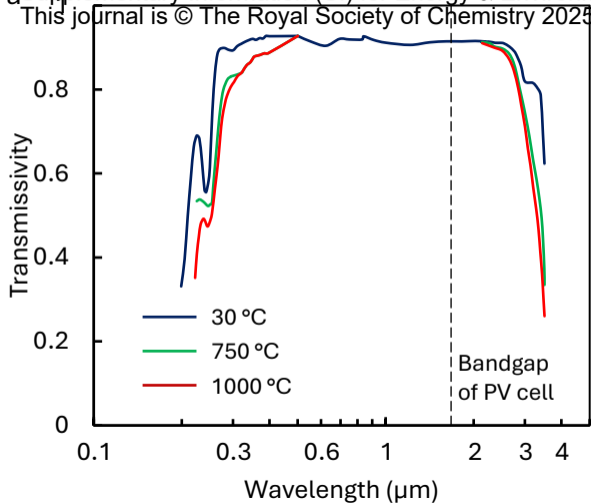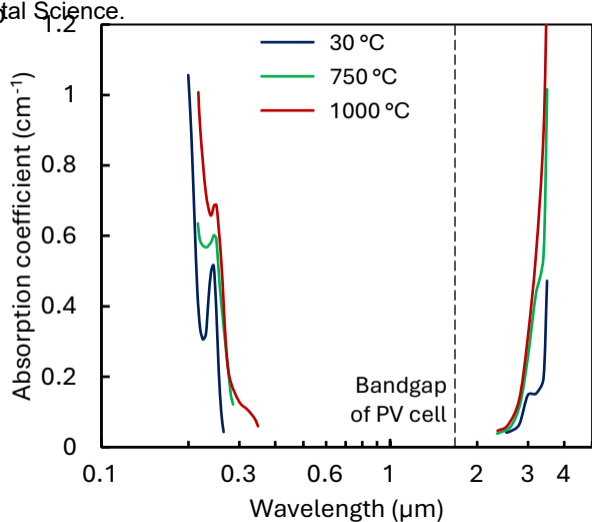

Supplement: d4ee04604h2.pdf [file d4ee04604h2.pdf]

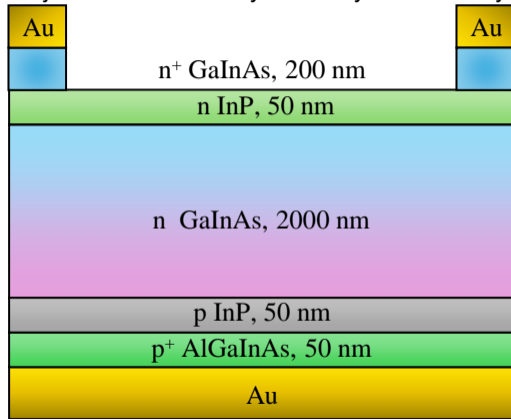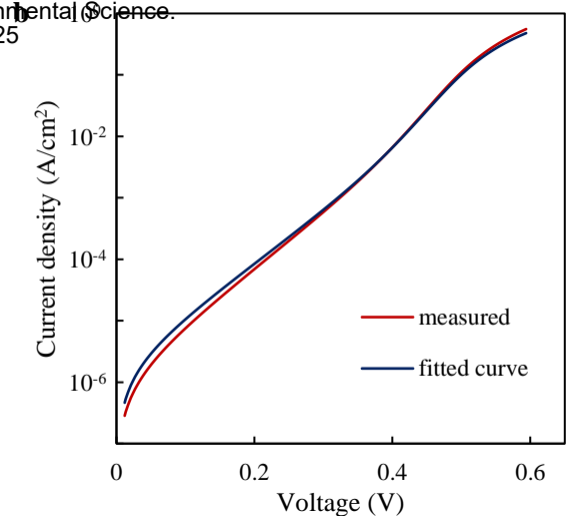

Supplement: d4ee04604h3.pdf [file d4ee04604h3.pdf]

### a Zero vacuum-gap TPV

Escaping radiation

Total internal reflection

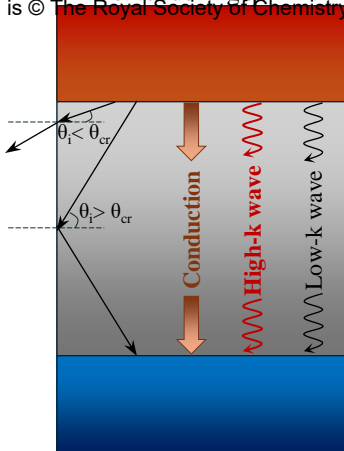

### b Light-pipe TPV

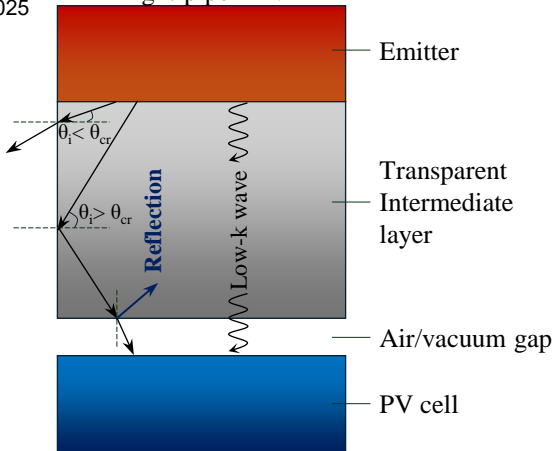

Supplement: d4ee04604h4.pdf [file d4ee04604h4.pdf]

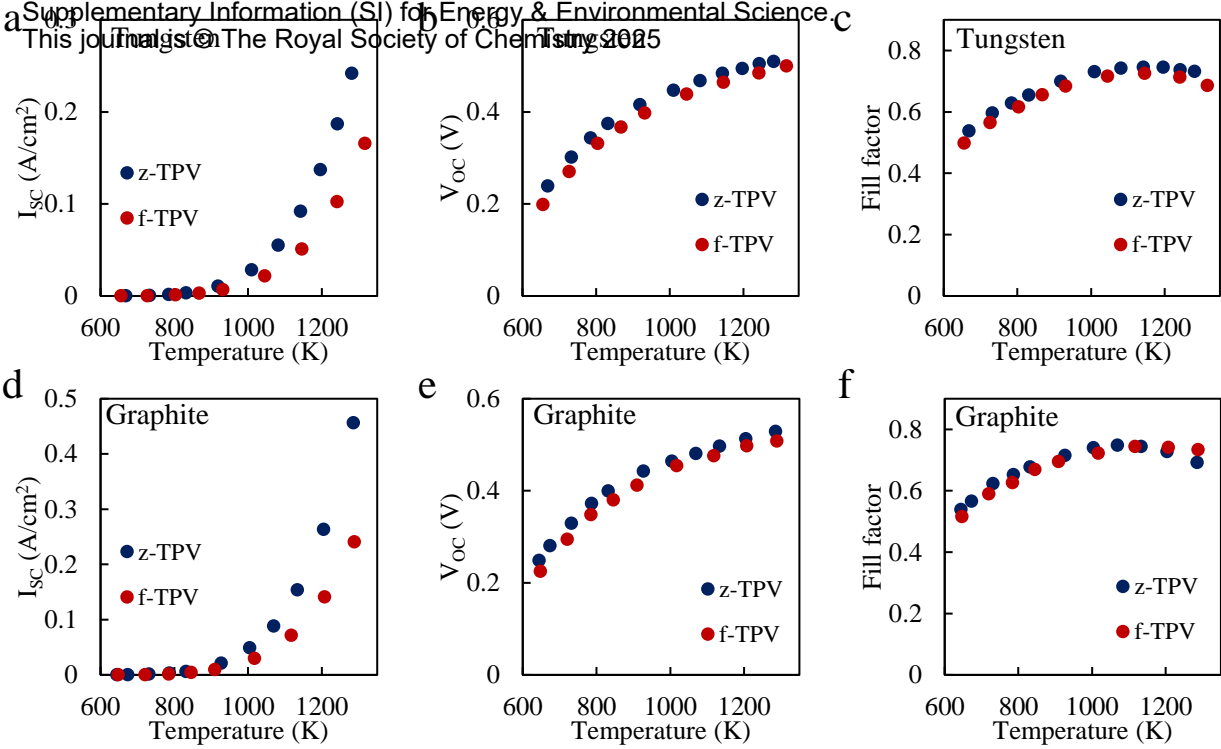

Supplement: d4ee04604h5.pdf [file d4ee04604h5.pdf]

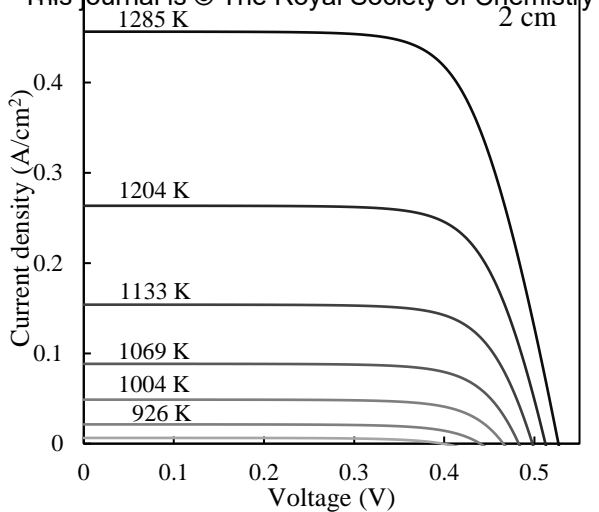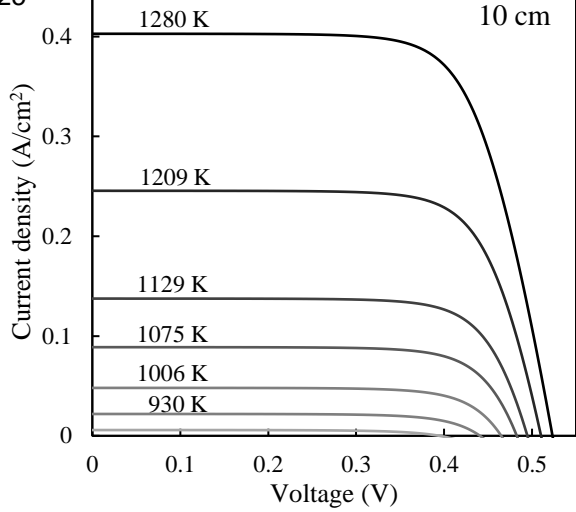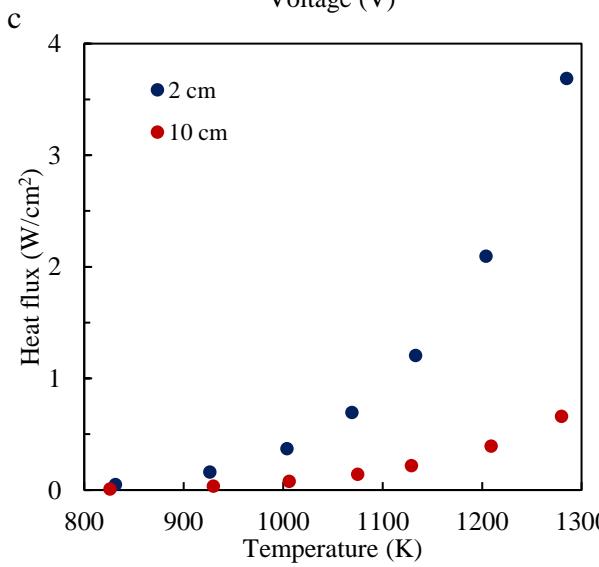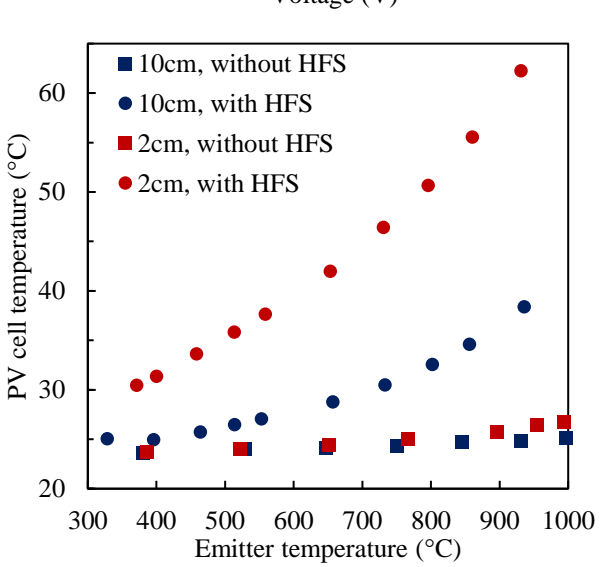

Supplement: d4ee04604h6.pdf [file d4ee04604h6.pdf]

**a** Escaping radiation  
 $R < 1, T > 0$

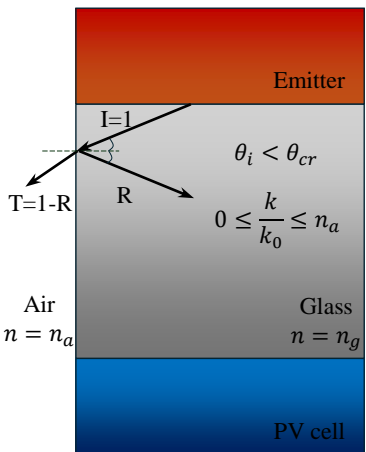

**b** Total internal reflection  
 $R=1, T=0$

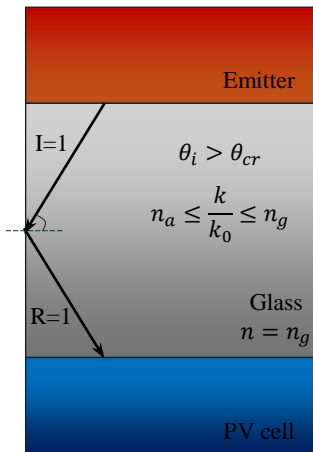

**c** Total internal reflection  
 $R=1, T=0$

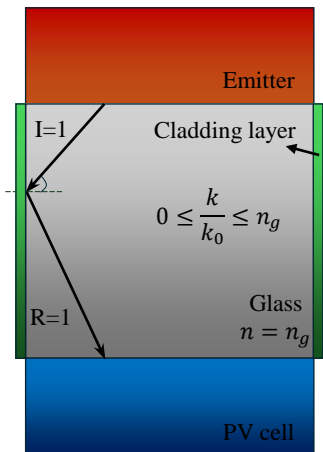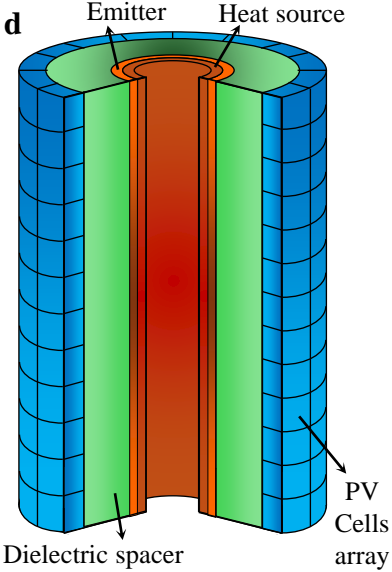

Supplement: d4ee04604h7.pdf [file d4ee04604h7.pdf]

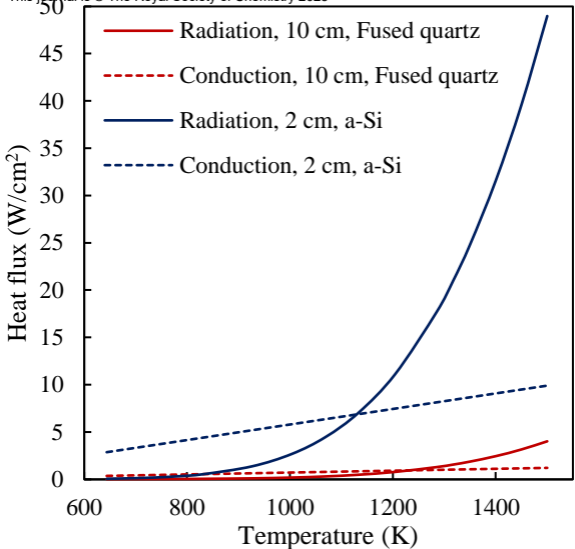

Supplement: d4ee04604h8.pdf [file d4ee04604h8.pdf]

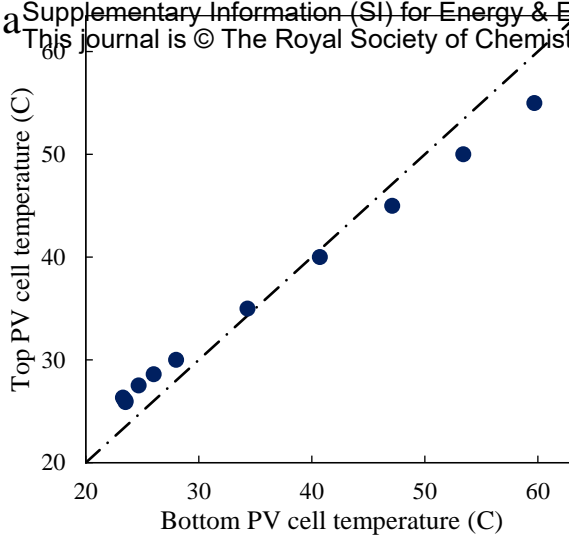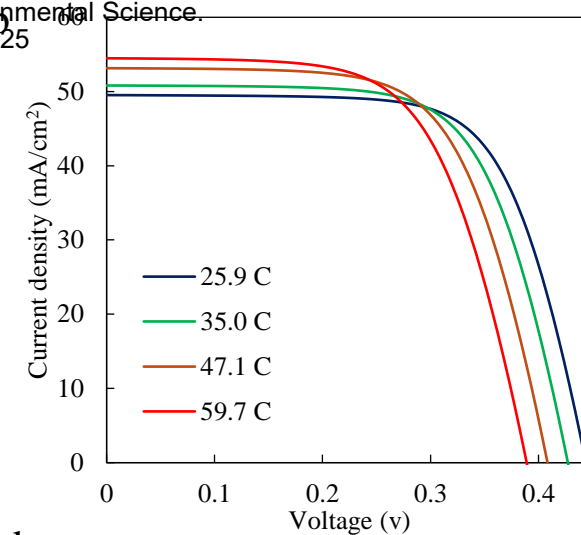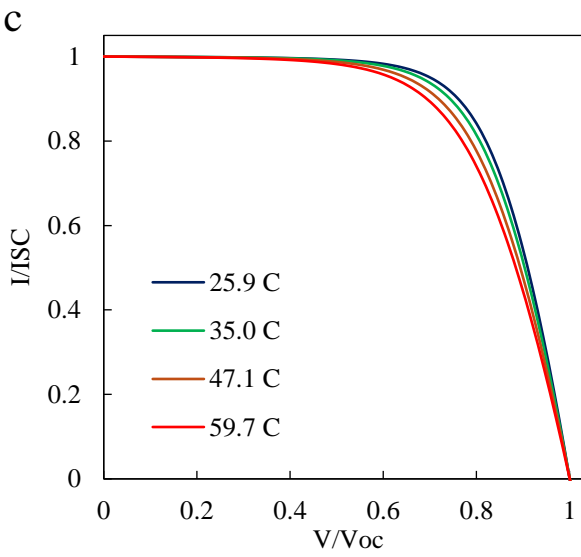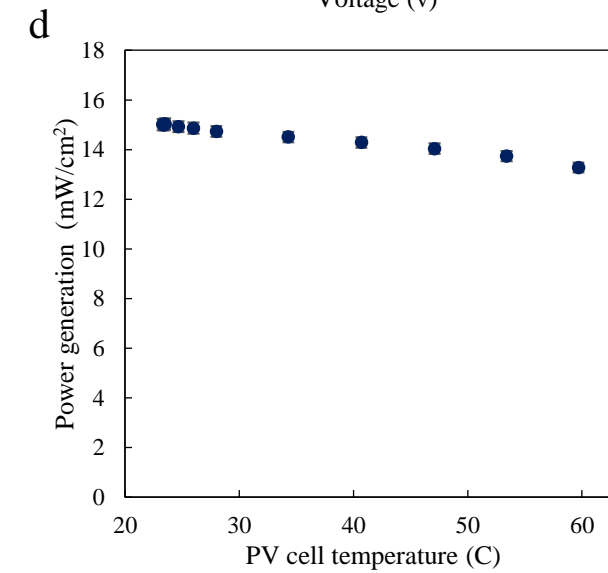

Supplement: d4ee04604h9.pdf [file d4ee04604h9.pdf]
